# Supplementary material
Source: PubMed Central journal article supplement (PMC5701656)
Supplement: NIHMS893659-supplement-supplement_1.pdf [file NIHMS893659-supplement-supplement_1.pdf]

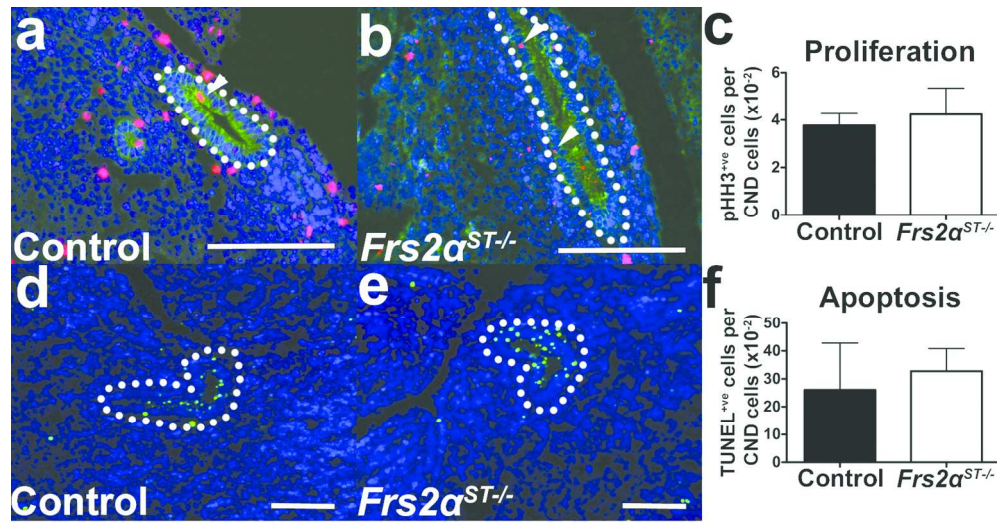

**Supplemental Figure S1 – CND proliferation and apoptosis are unchanged in E11.5**

***Frs2α<sup>ST-/-</sup>* embryos.**

(a-b) Immunofluorescent labeling reveals comparable numbers of phospho-histone H3 positive proliferating cells (red; arrowheads) within E-Cadherin-labeled common nephric ducts (green, dotted lines) in a control (a) and *Frs2α<sup>ST-/-</sup>* (b) embryo. (c) Graph confirms comparable mean levels of proliferating cells/100 CND cells in both genotypes. (d-e) Numbers of TUNEL positive cells (green) within CNDs (dotted lines) of the control (d) and *Frs2α<sup>ST-/-</sup>* embryo (e) appear similar. (f) Graph confirms comparable mean numbers of apoptotic cells/100 CND cells in control and mutant. Nuclei = blue. (n) = 3 per genotype. Values = Mean + SD. Student's Test analysis used. Scale bar = 200μm.

145x165mm (300 x 300 DPI)

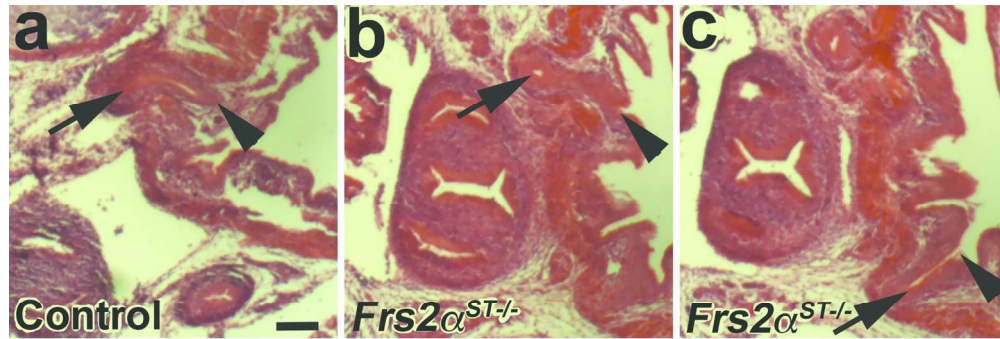

**Supplemental Figure S2 – H&E sections of P1 *Frs2 $\alpha$ <sup>ST-/-</sup>* refluxing ureters appear to insert in a straight line as opposed to non-refluxing mutant and control ureters that are curvilinear.**

Representative H&E stained images from P1 control (a) and non-refluxing ureters (b) show a curvilinear intravesicular shape from the outside of the bladder (arrow) to the luminal insertion (arrowhead). Similar images from a refluxing mutant (c) show a more straight linear intravesicular shape from the outside (arrow) to the luminal insertion (arrowhead). Scale bar = 100 $\mu$ m.

152x120mm (300 x 300 DPI)

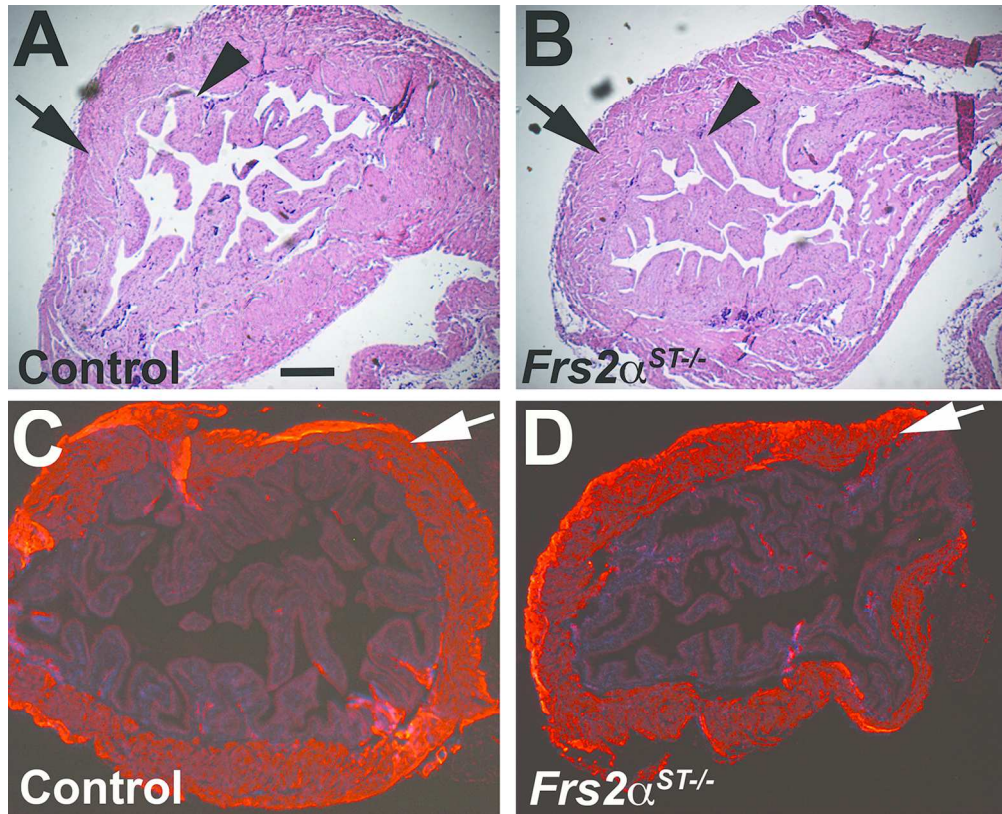

137x111mm (300 x 300 DPI)
